# Supplementary material
Source: PubMed Central journal article supplement (PMC546144)
Supplement: nar_33_1_143__1.pdf [file nar_33_1_143__1.pdf]

## Supplementary Materials

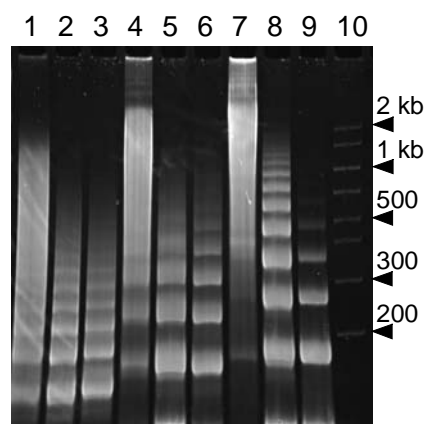

**Figure S1.** Polyacrylamide gel electrophoresis analysis of duplex lengths and differential mobilities for oligonucleotides assembled into duplexes with multiple nicks and gaps. Lanes 1-3, nicked-DNA from oligonucleotides N1 and N2 at strand stoichiometries of 1:1, 1:2, 1:4, respectively; lanes 4-6: nicked-gapped-DNA from oligonucleotides N1 and G2 at N1:G2 strand stoichiometries of 1:1, 1:2, 1:4, respectively; lanes 7-9: gapped-DNA from oligonucleotides G1 and G2 with G1:G2 strand stoichiometries of 1:1, 1:2, 1:4, respectively; lane 10, AmpliSize Molecular Ruler (Bio-Rad). Gel was 3.5% polyacrylamide with a running buffer of 1× TBE (pH 7.9).

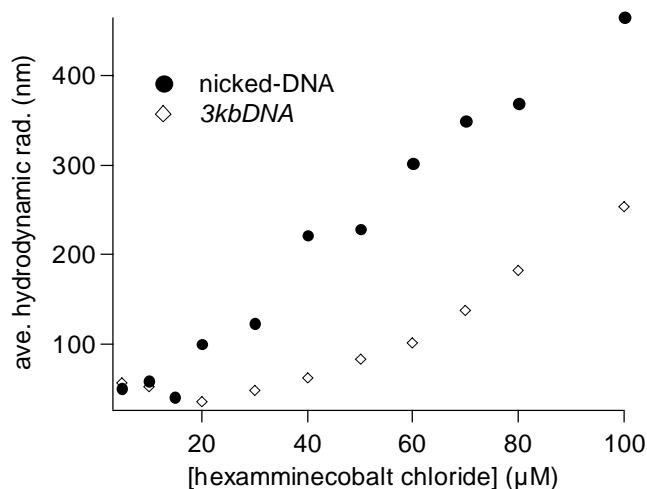

**Figure S2.** Hydrodynamic radius of nicked-DNA and 3kbDNA condensate as a function of hexamine cobalt chloride concentration. The average hydrodynamic radius of the particles was calculated based on diffusion coefficients obtained by dynamic light scattering (Materials and Methods).

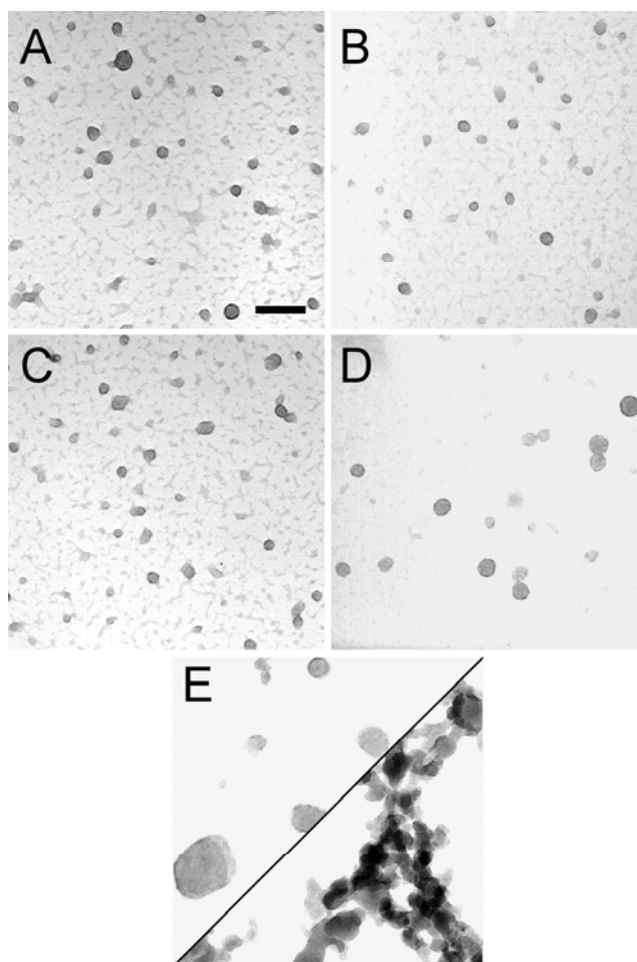

**Figure S3.** TEM images of particles formed by various DNA samples upon condensation with PLL. **(A)** Condensates formed by the nicked-DNA duplexes of oligonucleotides N1 and N2. **(B)** Condensates formed by the gapped-DNA duplexes of oligonucleotides G1 and G2. **(C)** Condensates formed by the nicked-gapped-DNA duplex of oligonucleotides N1 and G2. **(D)** Condensates formed by *3kbDNA*. **(E)** Condensates formed by 21-mer duplex. For all samples, DNA was 15  $\mu\text{M}$  in base pair, and was condensed by mixing with PLL at a charge ratio of 1:2 (DNA phosphate:lysine) in 5 mM Bis-Tris, 50  $\mu\text{M}$  EDTA (pH 7.0). Scale bar is 100 nm.

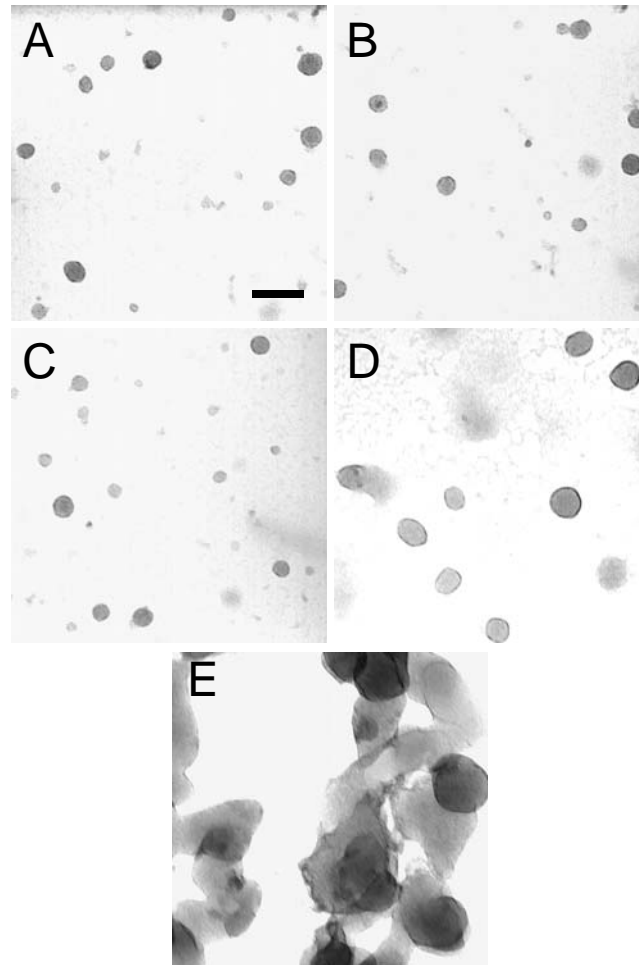

**Figure S4.** TEM images of particles formed by various DNA samples upon condensation with PEI. **(A)** Condensates formed by the nicked-DNA duplexes of oligonucleotides N1 and N2. **(B)** Condensates formed by the gapped-DNA duplexes of oligonucleotides G1 and G2. **(C)** Condensates formed by the nicked-gapped-DNA duplex of oligonucleotides N1 and G2. **(D)** Condensates formed by *3kbDNA*. **(E)** Condensates formed by 21-mer duplex. For all samples, DNA was 15  $\mu\text{M}$  in base pair, and was condensed by mixing with PEI at a charge ratio of 1:2 (DNA phosphate:protonation site of PEI) in 5 mM Bis-Tris, 50  $\mu\text{M}$  EDTA (pH 7.0). Scale bar is 100 nm.
